# Supplementary material
Source: publisher figshare collection journal article supplement (https://sage.figshare.com/ndownloader/files/13612544)
Supplement: Supplementary file 1 [file 13612544]

**Appendix Table A1. Distribution of NFL Game Surface Types, 2012-2016 Regular Season Games**

| Nominal descriptor of surface                                  | Number of games over study period (2012-2016) |
|----------------------------------------------------------------|-----------------------------------------------|
| <b>Synthetic</b>                                               | <b>555</b>                                    |
| A-Turf Titan 50                                                | 37                                            |
| AstroTurf Game Day 3D                                          | 39                                            |
| FieldTurf Classic HD                                           | 136                                           |
| FieldTurf Monofilament (Duraspine, Revolution, Revolution 360) | 96                                            |
| Hellas Matrix                                                  | 40                                            |
| Shaw Sports Turf Momentum                                      | 32                                            |
| UBU Sports Speed Series S5-M                                   | 175                                           |
| <b>Natural</b>                                                 | <b>725</b>                                    |
| Bermudagrass <sup>a</sup>                                      | 426                                           |
| Kentucky bluegrass <sup>b</sup>                                | 151                                           |
| Kikuyugrass <sup>c</sup>                                       | 1                                             |
| Seashore Paspalum <sup>d</sup>                                 | 8                                             |
| Hybrids (DD Grassmaster, StaLok, Reflex)                       | 139                                           |
| <b>Total Games</b>                                             | <b>1280</b>                                   |

<sup>a</sup> Predominant species: *Cynodon dactylon* (L.) Pers. Var. *dactylon* x *C. transvaalensis* Burt-Davy

<sup>b</sup> Predominant species: *Poa pratensis* L.

<sup>c</sup> *Pennisetum clandestinum* Hochst ex Chiov

<sup>d</sup> *Paspalum Vaginatatum* Swartz

**Appendix Table A2. Additional Analyses, 2012-2016 Regular Season Games**

| Injury Outcomes <sup>a,b</sup>                                                                                                                                                                                                                                                          | Main Results<br>(as reported in Figure 1) <sup>c</sup> |                         | Results for Additional Analyses |                         |                           |
|-----------------------------------------------------------------------------------------------------------------------------------------------------------------------------------------------------------------------------------------------------------------------------------------|--------------------------------------------------------|-------------------------|---------------------------------|-------------------------|---------------------------|
|                                                                                                                                                                                                                                                                                         | N                                                      | Unadjusted IRR (95% CI) | n                               | Unadjusted IRR (95% CI) | Absolute change<br>in IRR |
| <b>EXCLUSION OF TYPE OF SYNTHETIC FIELD TURF: Removal of fields with potentially meaningful differences from other synthetic fields [Seattle and New England: monofilament rather than slit film fibers; Dallas: lower infill depth (22.0 mm) compared to others (40.5 mm average)]</b> |                                                        |                         |                                 |                         |                           |
| Lower extremity                                                                                                                                                                                                                                                                         |                                                        |                         |                                 |                         |                           |
| Any time loss                                                                                                                                                                                                                                                                           | 4801                                                   | 1.16 (1.10 – 1.23)      | 4351                            | 1.19 (1.12 – 1.26)      | 0.03                      |
| ≥8 days                                                                                                                                                                                                                                                                                 | 1927                                                   | 1.11 (1.01 – 1.21)      | 1752                            | 1.13 (1.03 – 1.25)      | 0.02                      |
| Knee ankle foot                                                                                                                                                                                                                                                                         |                                                        |                         |                                 |                         |                           |
| Any time loss                                                                                                                                                                                                                                                                           | 3137                                                   | 1.18 (1.10 – 1.26)      | 2826                            | 1.19 (1.11 – 1.28)      | 0.01                      |
| ≥8 days                                                                                                                                                                                                                                                                                 | 1262                                                   | 1.18 (1.06 – 1.32)      | 1135                            | 1.19 (1.06 – 1.34)      | 0.01                      |
| <b>MECHANISM OF INJURY: Expand definition of “non-contact / surface contact” to include injuries reported as “contact - other” (i.e., non-player contact), or unknown contact type</b>                                                                                                  |                                                        |                         |                                 |                         |                           |
| Lower extremity                                                                                                                                                                                                                                                                         |                                                        |                         |                                 |                         |                           |
| Any time loss                                                                                                                                                                                                                                                                           | 1560                                                   | 1.27 (1.15 – 1.41)      | 2355                            | 1.29 (1.19 – 1.40)      | 0.02                      |
| ≥8 days                                                                                                                                                                                                                                                                                 | 691                                                    | 1.20 (1.04 – 1.40)      | 882                             | 1.23 (1.07 – 1.40)      | 0.03                      |
| Knee ankle foot                                                                                                                                                                                                                                                                         |                                                        |                         |                                 |                         |                           |
| Any time loss                                                                                                                                                                                                                                                                           | 745                                                    | 1.56 (1.35 – 1.80)      | 1289                            | 1.47 (1.31 – 1.63)      | 0.09                      |
| ≥8 days                                                                                                                                                                                                                                                                                 | 295                                                    | 1.67 (1.33 – 2.11)      | 416                             | 1.59 (1.31 – 1.93)      | 0.08                      |
| <b>MECHANISM OF INJURY: Examination of injuries reported as due to “player-contact” only</b>                                                                                                                                                                                            |                                                        |                         |                                 |                         |                           |
| Lower extremity                                                                                                                                                                                                                                                                         |                                                        |                         |                                 |                         |                           |
| Any time loss                                                                                                                                                                                                                                                                           | n/a                                                    | n/a                     | 2446                            | 1.06 (0.97 – 1.14)      | n/a                       |
| ≥8 days                                                                                                                                                                                                                                                                                 | n/a                                                    | n/a                     | 1045                            | 1.01 (0.90 – 1.15)      | n/a                       |
| Knee ankle foot                                                                                                                                                                                                                                                                         |                                                        |                         |                                 |                         |                           |
| Any time loss                                                                                                                                                                                                                                                                           | n/a                                                    | n/a                     | 1848                            | 1.01 (0.92 – 1.11)      | n/a                       |
| ≥8 days                                                                                                                                                                                                                                                                                 | n/a                                                    | n/a                     | 846                             | 1.02 (0.89 – 1.17)      | n/a                       |

<sup>a</sup>Any time loss' includes injuries that resulted in any amount of missed participation time in a NFL practice or game.

<sup>b</sup>'≥8 days' includes injuries that required a player to miss 8 or more days of participation in football activities, approximating at least one missed NFL game.

<sup>c</sup>Results as presented in Figure 1 for main study analyses for comparison to sensitivity analysis results.
